# Supplementary material for: CCL2 associated with CD38 expression during ex vivo expansion in human cord blood-derived hematopoietic stem cells
Source: publisher site journal article supplement (doi:10.18632/aging.203398), 2021-08-10
Supplement: Supplementary file [file aging-v13i15-203398-supplementary-material-SD1.pdf]

**SUPPLEMENTARY FIGURE**

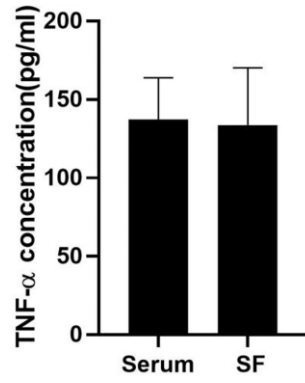

Supplementary Figure 1. Protein levels in serum and serum-free cultured hematopoietic stem cells by ELISA kit.
