# Supplementary material for: CCL2 associated with CD38 expression during ex vivo expansion in human cord blood-derived hematopoietic stem cells
Source: publisher site journal article supplement (doi:10.18632/aging.203398), 2021-08-10
Supplement: Supplementary file [file aging-v13i15-203398-supplementary-material-SD3.pdf]

## SUPPLEMENTARY TABLES

Please browse Full Text version to see the data of Supplementary Table 1.

**Supplementary Table 1. List of differential expressed genes in HSCs with two culture systems.**

**Supplementary Table 2. List of significant differential expression genes involved in inflammation pathway.**

| ID       | fbs Avg (log2) | sf Avg (log2) | Fold Change | P-val    | FDR P-val | Gene Symbol    |
|----------|----------------|---------------|-------------|----------|-----------|----------------|
| 16940172 | 8.35           | 4.83          | 11.49       | 2.83E-07 | 0.0013    | CCR2           |
| 16711501 | 6.83           | 2.81          | 16.27       | 3.46E-07 | 0.0013    | IL2RA          |
| 16952874 | 7.54           | 3.42          | 17.31       | 5.05E-07 | 0.0013    | CCR1           |
| 17106493 | 8.59           | 6.15          | 5.43        | 1.72E-06 | 0.0016    | IL13RA1        |
| 16843602 | 7.39           | 4.6           | 6.91        | 1.93E-06 | 0.0017    | CCL3L3; CCL3L1 |
| 16833426 | 6.14           | 3.39          | 6.74        | 2.76E-06 | 0.0018    | CCL4L2; CCL4L1 |
| 16989496 | 6.66           | 4.76          | 3.73        | 9.84E-06 | 0.0029    | TGFBI          |
| 17024144 | 6.82           | 5.22          | 3.02        | 1.09E-05 | 0.003     | IFNGR1         |
| 16950216 | 4.99           | 3.4           | 3.01        | 1.33E-05 | 0.0033    | IL5RA          |
| 17006659 | 8.71           | 6.01          | 6.51        | 1.52E-05 | 0.0033    | TNF            |
| 16833204 | 9.83           | 5.29          | 23.34       | 1.97E-05 | 0.0038    | CCL2           |
| 17116694 | 5.48           | 7.05          | -2.96       | 3.13E-05 | 0.0047    | IL9R           |
| 16933760 | 6.46           | 4.8           | 3.17        | 4.82E-05 | 0.0057    | LIF            |
| 16908305 | 6.83           | 3.44          | 10.51       | 5.02E-05 | 0.0057    | CXCR2P1        |
| 16883715 | 5.53           | 4.08          | 2.73        | 5.23E-05 | 0.0058    | IL18R1         |
| 16786587 | 6.13           | 5.05          | 2.11        | 0.0002   | 0.0105    | FOS            |
| 16833420 | 3.66           | 2.6           | 2.08        | 0.0011   | 0.0274    | CCL4           |
| 16840113 | 5.05           | 3.82          | 2.36        | 0.0015   | 0.0325    | CXCL16         |

**Supplementary Table 3. Primer sequences for real time quantitative RT-PCR.**

| Name             | Sequence (5'-3')        | Size (mer.) |
|------------------|-------------------------|-------------|
| GAPDH-F          | TGCACCACCAACTGCTTAGC    | 20          |
| GAPDH-R          | GGCATGGACTGTGGTCATGAG   | 21          |
| FOS-F            | AGAATCCGAAGGGAAAGGAA    | 20          |
| FOS-R            | AGGGCCCTTATGCTCAATCT    | 20          |
| CCL2-F           | GCTCATAGCAGCCACCTTCATTC | 23          |
| CCL2-R           | GGACACTTGCTGCTGGTGATTC  | 22          |
| TNF- $\alpha$ -F | CCAGGCAGTCAGATCATCTTC   | 21          |
| TNF- $\alpha$ -R | GTTATCTCTCAGCTCCACGC    | 20          |
