# Supplementary material for: CCL2 associated with CD38 expression during ex vivo expansion in human cord blood-derived hematopoietic stem cells
Source: Aging (Albany NY). 2021 Aug 10;13(15):19878–93. doi: 10.18632/aging.203398 (PMC8386547; doi:10.18632/aging.203398)
Supplement: Supplementary Table 1 [file aging-13-203398-s002.xlsx]

## Sheet: S1
Supplementary Table 1. List of differential expressed genes in HSCs with two culture systems.
Probe ID	Gene Symbol	Description	Fold Change	P-val
16986433	CRHBP	corticotropin releasing hormone binding protein	-10.48	3.28e-07
17111725	EDA2R	ectodysplasin A2 receptor	-9.01	3.39e-06
17104049	SNORA11; MAGED2	small nucleolar RNA, H/ACA box 11; MAGE family member D2	-7.41	9.6e-06
16988441	LOC102467226	uncharacterized LOC102467226	-6.71	1.8e-05
16798345	SNORD115-22	small nucleolar RNA, C/D box 115-22	-6.15	1.95e-05
16798303	SNORD115-11; SNORD115-29; SNORD115-36; SNORD115-43	small nucleolar RNA, C/D box 115-11; small nucleolar RNA, C/D box 115-29; small nucleolar RNA, C/D box 115-36; small nucleolar RNA, C/D box 115-43	-5.78	2.04e-05
16798402	SNORD115-11; SNORD115-29; SNORD115-36; SNORD115-43	small nucleolar RNA, C/D box 115-11; small nucleolar RNA, C/D box 115-29; small nucleolar RNA, C/D box 115-36; small nucleolar RNA, C/D box 115-43	-5.78	2.04e-05
16798416	SNORD115-11; SNORD115-29; SNORD115-36; SNORD115-43	small nucleolar RNA, C/D box 115-11; small nucleolar RNA, C/D box 115-29; small nucleolar RNA, C/D box 115-36; small nucleolar RNA, C/D box 115-43	-5.78	2.04e-05
16798430	SNORD115-11; SNORD115-29; SNORD115-36; SNORD115-43	small nucleolar RNA, C/D box 115-11; small nucleolar RNA, C/D box 115-29; small nucleolar RNA, C/D box 115-36; small nucleolar RNA, C/D box 115-43	-5.78	2.04e-05
16798270	SNORD115-5	small nucleolar RNA, C/D box 115-5	-5.78	2.04e-05
16798286	SNORD115-9; SNORD115-12	small nucleolar RNA, C/D box 115-9; small nucleolar RNA, C/D box 115-12	-5.78	2.04e-05
16798305	SNORD115-9; SNORD115-12	small nucleolar RNA, C/D box 115-9; small nucleolar RNA, C/D box 115-12	-5.78	2.04e-05
17103653	GAGE13; GAGE12J; GAGE8; GAGE2C	G antigen 13; G antigen 12J; G antigen 8; G antigen 2C	-5.22	0.0001
16884050	SULT1C4	sulfotransferase family 1C member 4	-5.11	3.41e-05
16850428	ROCK1P1	Rho-associated, coiled-coil containing protein kinase 1 pseudogene 1	-5.03	0.0003
16724346	MDK	midkine (neurite growth-promoting factor 2)	-5	2.89e-06
16983765	NPR3	natriuretic peptide receptor 3	-4.79	2.36e-06
16924276	LOC101927745	uncharacterized LOC101927745	-4.76	9.52e-05
16858592	ZNF844	zinc finger protein 844	-4.65	9.84e-06
16913572	SNORA60	small nucleolar RNA, H/ACA box 60	-4.5	2.53e-05
16798428	SNORD115-42; SNORD115-10	small nucleolar RNA, C/D box 115-42; small nucleolar RNA, C/D box 115-10	-4.43	2.9e-06
16798278	SNORD115-6	small nucleolar RNA, C/D box 115-6	-4.43	2.9e-06
16938989	ITGA9	integrin alpha 9	-4.31	4.4e-06
16798422	SNORD115-39	small nucleolar RNA, C/D box 115-39	-4.25	0.0017
16983611	LINC01021	long intergenic non-protein coding RNA 1021	-4.19	2.22e-05
17001324	JAKMIP2	janus kinase and microtubule interacting protein 2	-4.14	9.07e-06
16823889	MIR548H2	microRNA 548h-2	-4.08	0.0032
16665901	IL12RB2	interleukin 12 receptor, beta 2	-4.06	5.9e-06
16836260	HLF	hepatic leukemia factor	-3.91	1.08e-05
16819539	ADGRG1	adhesion G protein-coupled receptor G1	-3.67	2.15e-05
17048382	LOC101927497	uncharacterized LOC101927497	-3.57	1.15e-05
17074342	LINC00965	long intergenic non-protein coding RNA 965	-3.52	5.5e-05
16741501	DHCR7	7-dehydrocholesterol reductase	-3.48	1.17e-05
16900136	IGKV1-17; IGKC	immunoglobulin kappa variable 1-17; immunoglobulin kappa constant	-3.42	3.28e-05
17079317	TP53INP1	tumor protein p53 inducible nuclear protein 1	-3.38	1.55e-05
16889829	ICOS	inducible T-cell co-stimulator	-3.36	7.41e-05
16983795	LOC105374716	uncharacterized LOC105374716	-3.36	3.79e-05
16805995	NIPA1	non imprinted in Prader-Willi/Angelman syndrome 1	-3.34	0.0047
16916605	CPXM1	carboxypeptidase X (M14 family), member 1	-3.31	7.56e-06
17071478	LOC105375675	uncharacterized LOC105375675	-3.3	0.0001
17052935	OR2A9P; OR2A20P	olfactory receptor, family 2, subfamily A, member 9 pseudogene; olfactory receptor, family 2, subfamily A, member 20 pseudogene	-3.29	0.0003
16805623	LOC400464	uncharacterized LOC400464	-3.26	1.09e-05
16839216	LOC105371430	mucin-17-like	-3.16	1.18e-05
17109832	PCYT1B	phosphate cytidylyltransferase 1, choline, beta	-3.16	2.37e-05
17099466	ABO	ABO blood group (transferase A, alpha 1-3-N-acetylgalactosaminyltransferase; transferase B, alpha 1-3-galactosyltransferase)	-3.15	0.0003
17112235	ZDHHC15	zinc finger, DHHC-type containing 15	-3.11	1.52e-05
16926644	LSS	lanosterol synthase (2,3-oxidosqualene-lanosterol cyclase)	-3.08	3.59e-05
16679769	OR2L1P	olfactory receptor, family 2, subfamily L, member 1 pseudogene	-3.07	4.03e-05
16788620	SNORD114-3	small nucleolar RNA, C/D box 114-3	-3.06	0.0002
16995890	HMGCS1	3-hydroxy-3-methylglutaryl-CoA synthase 1 (soluble)	-3.05	2.67e-05
16884280	LINC01123	long intergenic non-protein coding RNA 1123	-3.05	9.25e-05
16974534	PROM1	prominin 1	-3.03	1.48e-05
17061097	RASA4B; RASA4	RAS p21 protein activator 4B; RAS p21 protein activator 4	-3.01	6.5e-05
16700713	SNORA14B	small nucleolar RNA, H/ACA box 14B	-2.97	4.05e-05
16977378	TMEM150C	transmembrane protein 150C	-2.97	0.0006
17116694	IL9R	interleukin 9 receptor	-2.96	3.13e-05
16945465	LOC105374104	uncharacterized LOC105374104	-2.95	0.0007
16973934	CYTL1	cytokine like 1	-2.94	1.58e-05
16740778	SLC29A2	solute carrier family 29 (equilibrative nucleoside transporter), member 2	-2.93	0.0012
17056137	HOXA5	homeobox A5	-2.92	1.35e-05
17117682	MMP25-AS1	MMP25 antisense RNA 1	-2.92	1.67e-05
17094496	MIR1299	microRNA 1299	-2.88	2.38e-05
16861516	LINC01535	long intergenic non-protein coding RNA 1535	-2.83	0.0023
16743056	ME3	malic enzyme 3, NADP(+)-dependent, mitochondrial	-2.83	1.65e-05
17061110	RASA4B; RASA4	RAS p21 protein activator 4B; RAS p21 protein activator 4	-2.83	6.07e-05
16894706	LOC105373444	uncharacterized LOC105373444	-2.83	1.54e-05
16798242	SNORD116-30	small nucleolar RNA, C/D box 116-30	-2.82	0.0007
16698801	CD34	CD34 molecule	-2.81	1.53e-05
16896934	LOC105374569	uncharacterized LOC105374569	-2.81	0.0002
16842266	MFAP4	microfibrillar associated protein 4	-2.8	2.12e-05
16979825	PABPC4L	poly(A) binding protein, cytoplasmic 4-like	-2.8	3.27e-05
17046407	ZNF727	zinc finger protein 727	-2.8	4.06e-05
16694357	SNORA80E	small nucleolar RNA, H/ACA box 80E	-2.79	7.98e-05
16714581	SLC16A9	solute carrier family 16, member 9	-2.78	0.0002
16718666	ABLIM1	actin binding LIM protein 1	-2.77	0.0004
16884285	LOC100507334	two pore channel 3 pseudogene	-2.77	8.8e-05
16981444	AADAT	aminoadipate aminotransferase	-2.76	6.39e-05
16800229	MAP1A	microtubule associated protein 1A	-2.76	6.56e-05
16760514	SCARNA11	small Cajal body-specific RNA 11	-2.74	0.0001
17064230	ACTR3C	ARP3 actin-related protein 3 homolog C (yeast)	-2.69	4.75e-05
17113346	CHRDL1	chordin-like 1	-2.68	0.0002
16875881	ZNF667	zinc finger protein 667	-2.68	0.0002
16663498	MPL	MPL proto-oncogene, thrombopoietin receptor	-2.66	3.98e-05
17005760	LOC102724851; LOC105374994	uncharacterized LOC102724851; uncharacterized LOC105374994	-2.64	6.93e-05
17103784	NUDT10	nudix hydrolase 10	-2.62	0.0054
17061099	RASA4B	RAS p21 protein activator 4B	-2.62	0.0099
16877413	MYCN	v-myc avian myelocytomatosis viral oncogene neuroblastoma derived homolog	-2.62	0.0003
17059628	CYP51A1; LRRD1	cytochrome P450, family 51, subfamily A, polypeptide 1; leucine-rich repeats and death domain containing 1	-2.61	4.14e-05
16925602	ERG	v-ets avian erythroblastosis virus E26 oncogene homolog	-2.61	5.3e-05
16896710	SOS1	SOS Ras/Rac guanine nucleotide exchange factor 1	-2.6	4.87e-05
16900724	LOC100506123	uncharacterized LOC100506123	-2.6	0.0008
16850107	FASN	fatty acid synthase	-2.58	3.33e-05
16719638	LOC102725247	uncharacterized LOC102725247	-2.57	0.0001
16991527	CYFIP2	cytoplasmic FMR1 interacting protein 2	-2.56	2.5e-05
16776959	GAS6-AS1	GAS6 antisense RNA 1	-2.56	5.54e-05
16687618	DHCR24	24-dehydrocholesterol reductase	-2.55	2.91e-05
17103647	GAGE2C; GAGE2A; GAGE2D	G antigen 2C; G antigen 2A; G antigen 2D	-2.55	0.0003
16893846	PXDN	peroxidasin	-2.54	0.0004
16854360	ZNF521	zinc finger protein 521	-2.54	7.83e-05
16798208	SNORD116-21; SNORD116@; SNORD116-20	small nucleolar RNA, C/D box 116-21; small nucleolar RNA, C/D box 116 cluster; small nucleolar RNA, C/D box 116-20	-2.53	2.64e-05
16755265	MIR331	microRNA 331	-2.52	0.0035
16798132	SNORD116-1	small nucleolar RNA, C/D box 116-1	-2.52	0.0014
16708249	SCD	stearoyl-CoA desaturase (delta-9-desaturase)	-2.52	2.72e-05
17091299	FAM69B	family with sequence similarity 69, member B	-2.51	2.64e-05
16971712	GUCY1A3	guanylate cyclase 1, soluble, alpha 3	-2.51	3.71e-05
16823275	MMP25-AS1	MMP25 antisense RNA 1	-2.51	0.0003
17012245	NKAIN2	Na+/K+ transporting ATPase interacting 2	-2.51	0.0008
16850759	PTPRM	protein tyrosine phosphatase, receptor type, M	-2.5	4.46e-05
16938701	TRIM71	tripartite motif containing 71, E3 ubiquitin protein ligase	-2.5	0.0035
16813038	MFGE8	milk fat globule-EGF factor 8 protein	-2.49	0.0001
17103673	GAGE12F; GAGE12G; GAGE2E; GAGE4; GAGE6	G antigen 12F; G antigen 12G; G antigen 2E; G antigen 4; G antigen 6	-2.48	0.0011
16819064	MMP2	matrix metallopeptidase 2	-2.48	2.73e-05
16689907	CNN3	calponin 3, acidic	-2.47	0.0003
16871642	LINC00665	long intergenic non-protein coding RNA 665	-2.47	8.41e-05
16972155	MSMO1	methylsterol monooxygenase 1	-2.47	5.07e-05
16691969	LOC105371220	uncharacterized LOC105371220	-2.47	6.92e-05
16875997	ZNF154	zinc finger protein 154	-2.47	0.0003
16971078	GUSBP5	glucuronidase, beta pseudogene 5	-2.46	8.54e-05
16965039	USP17L6P	ubiquitin specific peptidase 17-like family member 6, pseudogene	-2.46	0.0002
16691803	LOC105379516	uncharacterized LOC105379516	-2.46	0.0055
16697660	MIR181B1	microRNA 181b-1	-2.43	3.33e-05
16811684	CYP1A1	cytochrome P450, family 1, subfamily A, polypeptide 1	-2.42	6.33e-05
16679773	OR2L5	olfactory receptor, family 2, subfamily L, member 5	-2.42	0.0149
16798341	SNORD115-20; SNORD115-15	small nucleolar RNA, C/D box 115-20; small nucleolar RNA, C/D box 115-15	-2.41	0.004
16909401	SLC16A14	solute carrier family 16, member 14	-2.41	6.23e-05
16985759	LOC102724275; LOC102724356; LOC105369228; LOC102725134	uncharacterized LOC102724275; uncharacterized LOC102724356; uncharacterized LOC105369228; uncharacterized LOC102725134	-2.41	0.0004
16920338	ATP9A	ATPase, class II, type 9A	-2.4	8.28e-05
16679766	OR2AK2	olfactory receptor, family 2, subfamily AK, member 2	-2.4	0.0044
16668109	SCARNA2	small Cajal body-specific RNA 2	-2.4	0.0003
16975751	TXK	TXK tyrosine kinase	-2.4	3.34e-05
16965021	USP17L25; USP17L24; USP17L26; USP17L27; USP17L28; USP17L29; USP17L30; USP17L14P; USP17L5	ubiquitin specific peptidase 17-like family member 25; ubiquitin specific peptidase 17-like family member 24; ubiquitin specific peptidase 17-like family member 26; ubiquitin specific peptidase 17-like family member 27; ubiquitin specific peptidase 17-like family member 28; ubiquitin specific peptidase 17-like family member 29; ubiquitin specific peptidase 17-like family member 30; ubiquitin spec…	-2.4	0.0004
16965023	USP17L25; USP17L24; USP17L26; USP17L27; USP17L28; USP17L29; USP17L30; USP17L5	ubiquitin specific peptidase 17-like family member 25; ubiquitin specific peptidase 17-like family member 24; ubiquitin specific peptidase 17-like family member 26; ubiquitin specific peptidase 17-like family member 27; ubiquitin specific peptidase 17-like family member 28; ubiquitin specific peptidase 17-like family member 29; ubiquitin specific peptidase 17-like family member 30; ubiquitin spec…	-2.4	0.0004
16965025	USP17L25; USP17L24; USP17L26; USP17L27; USP17L28; USP17L29; USP17L30; USP17L5	ubiquitin specific peptidase 17-like family member 25; ubiquitin specific peptidase 17-like family member 24; ubiquitin specific peptidase 17-like family member 26; ubiquitin specific peptidase 17-like family member 27; ubiquitin specific peptidase 17-like family member 28; ubiquitin specific peptidase 17-like family member 29; ubiquitin specific peptidase 17-like family member 30; ubiquitin spec…	-2.4	0.0004
16965029	USP17L25; USP17L24; USP17L26; USP17L27; USP17L28; USP17L29; USP17L30; USP17L5	ubiquitin specific peptidase 17-like family member 25; ubiquitin specific peptidase 17-like family member 24; ubiquitin specific peptidase 17-like family member 26; ubiquitin specific peptidase 17-like family member 27; ubiquitin specific peptidase 17-like family member 28; ubiquitin specific peptidase 17-like family member 29; ubiquitin specific peptidase 17-like family member 30; ubiquitin spec…	-2.4	0.0004
16965031	USP17L25; USP17L24; USP17L26; USP17L27; USP17L28; USP17L29; USP17L30; USP17L5	ubiquitin specific peptidase 17-like family member 25; ubiquitin specific peptidase 17-like family member 24; ubiquitin specific peptidase 17-like family member 26; ubiquitin specific peptidase 17-like family member 27; ubiquitin specific peptidase 17-like family member 28; ubiquitin specific peptidase 17-like family member 29; ubiquitin specific peptidase 17-like family member 30; ubiquitin spec…	-2.4	0.0004
16965033	USP17L25; USP17L24; USP17L26; USP17L27; USP17L28; USP17L29; USP17L30; USP17L5	ubiquitin specific peptidase 17-like family member 25; ubiquitin specific peptidase 17-like family member 24; ubiquitin specific peptidase 17-like family member 26; ubiquitin specific peptidase 17-like family member 27; ubiquitin specific peptidase 17-like family member 28; ubiquitin specific peptidase 17-like family member 29; ubiquitin specific peptidase 17-like family member 30; ubiquitin spec…	-2.4	0.0004
16965037	USP17L25; USP17L24; USP17L26; USP17L27; USP17L28; USP17L29; USP17L30; USP17L5	ubiquitin specific peptidase 17-like family member 25; ubiquitin specific peptidase 17-like family member 24; ubiquitin specific peptidase 17-like family member 26; ubiquitin specific peptidase 17-like family member 27; ubiquitin specific peptidase 17-like family member 28; ubiquitin specific peptidase 17-like family member 29; ubiquitin specific peptidase 17-like family member 30; ubiquitin spec…	-2.4	0.0004
16883194	LOC100506123	uncharacterized LOC100506123	-2.4	4.39e-05
16708260	OLMALINC	oligodendrocyte maturation-associated long intergenic non-coding RNA	-2.39	0.0024
17113980	SMARCA1	SWI/SNF related, matrix associated, actin dependent regulator of chromatin, subfamily a, member 1	-2.39	0.0002
16797929	LOC105370733	uncharacterized LOC105370733	-2.39	0.0338
16965000	USP17L11; USP17L9P; USP17L20	ubiquitin specific peptidase 17-like family member 11; ubiquitin specific peptidase 17-like family member 9, pseudogene; ubiquitin specific peptidase 17-like family member 20	-2.38	0.0006
16870776	ZNF826P	zinc finger protein 826, pseudogene	-2.38	0.0003
16851768	DSG2	desmoglein 2	-2.37	4.28e-05
16769941	MMAB	methylmalonic aciduria (cobalamin deficiency) cblB type	-2.37	0.0033
16798206	SNORD116-20; SNORD116@	small nucleolar RNA, C/D box 116-20; small nucleolar RNA, C/D box 116 cluster	-2.37	3.6e-05
16939910	ZNF660; ZNF197; ZKSCAN7	zinc finger protein 660; zinc finger protein 197; zinc finger with KRAB and SCAN domains 7	-2.37	6.37e-05
17071607	BAALC	brain and acute leukemia, cytoplasmic	-2.36	0.0009
17112560	NAP1L3	nucleosome assembly protein 1-like 3	-2.36	0.0015
17113443	XACT	X active specific transcript (non-protein coding)	-2.36	0.0003
17103690	GAGE12H	G antigen 12H	-2.35	0.0004
16884372	MERTK	MER proto-oncogene, tyrosine kinase	-2.35	0.0002
16994340	CMBL	carboxymethylenebutenolidase homolog (Pseudomonas)	-2.33	0.0003
16989863	SNORA74A	small nucleolar RNA, H/ACA box 74A	-2.33	9.61e-05
16909520	SNORA75	small nucleolar RNA, H/ACA box 75	-2.33	7.01e-05
16719879	LOC105379876	uncharacterized LOC105379876	-2.33	0.0005
16797403	ZCWPW2; IGHM	zinc finger, CW type with PWWP domain 2; immunoglobulin heavy constant mu	-2.33	4.14e-05
17052973	CNTNAP2	contactin associated protein-like 2	-2.32	0.0007
16946966	MED12L	mediator complex subunit 12 like	-2.32	4.11e-05
16911338	PLCB4	phospholipase C, beta 4	-2.32	0.0016
16798146	SNORD116-5; SNORD116-7	small nucleolar RNA, C/D box 116-5; small nucleolar RNA, C/D box 116-7	-2.32	4.85e-05
16798150	SNORD116-5; SNORD116-7	small nucleolar RNA, C/D box 116-5; small nucleolar RNA, C/D box 116-7	-2.32	4.85e-05
17061106	RASA4B; RASA4	RAS p21 protein activator 4B; RAS p21 protein activator 4	-2.31	6.03e-05
17056060	KIAA0087	KIAA0087	-2.3	0.0003
16965027	USP17L5	ubiquitin specific peptidase 17-like family member 5	-2.3	0.0008
16919864	ZNF334	zinc finger protein 334	-2.3	0.0075
16798144	SNORD116-3; SNORD116-9	small nucleolar RNA, C/D box 116-3; small nucleolar RNA, C/D box 116-9	-2.29	4.92e-05
16798154	SNORD116-3; SNORD116-9	small nucleolar RNA, C/D box 116-3; small nucleolar RNA, C/D box 116-9	-2.29	4.92e-05
16798152	SNORD116-8	small nucleolar RNA, C/D box 116-8	-2.29	4.63e-05
17099463	ABO	ABO blood group (transferase A, alpha 1-3-N-acetylgalactosaminyltransferase; transferase B, alpha 1-3-galactosyltransferase)	-2.28	0.0003
16712076	FAM171A1	family with sequence similarity 171, member A1	-2.28	0.0002
16798148	SNORD116-6	small nucleolar RNA, C/D box 116-6	-2.28	4.77e-05
16665621	CACHD1	cache domain containing 1	-2.27	7.46e-05
17025046	CNKSR3	CNKSR family member 3	-2.27	4.45e-05
16765657	TESPA1	thymocyte expressed, positive selection associated 1	-2.27	0.0001
16965007	USP17L17	ubiquitin specific peptidase 17-like family member 17	-2.27	0.0011
16942919	HTR1F	5-hydroxytryptamine (serotonin) receptor 1F, G protein-coupled	-2.25	4.57e-05
16944931	FAM86JP	family with sequence similarity 86, member A pseudogene	-2.25	0.0002
16965013	USP17L20; USP17L9P	ubiquitin specific peptidase 17-like family member 20; ubiquitin specific peptidase 17-like family member 9, pseudogene	-2.25	0.0012
16965017	USP17L22; USP17L9P	ubiquitin specific peptidase 17-like family member 22; ubiquitin specific peptidase 17-like family member 9, pseudogene	-2.25	0.0011
17092767	MLLT3	myeloid/lymphoid or mixed-lineage leukemia; translocated to, 3	-2.24	0.0003
16798138	SNORD116-2	small nucleolar RNA, C/D box 116-2	-2.24	4.8e-05
16669278	FAM46C	family with sequence similarity 46, member C	-2.21	0.0002
16860221	ZNF257	zinc finger protein 257	-2.21	0.0008
16725742	FADS2	fatty acid desaturase 2	-2.2	0.0002
16926778	TPTEP1	transmembrane phosphatase with tensin homology pseudogene 1	-2.2	6.7e-05
16965011	USP17L19	ubiquitin specific peptidase 17-like family member 19	-2.2	0.0008
16738933	VWCE	von Willebrand factor C and EGF domains	-2.2	0.0002
16809403	MYO5C	myosin VC	-2.19	0.0003
16960149	PLSCR4	phospholipid scramblase 4	-2.19	0.0081
16965002	USP17L12	ubiquitin specific peptidase 17-like family member 12	-2.19	0.0018
16965015	USP17L21	ubiquitin specific peptidase 17-like family member 21	-2.19	0.0018
16812469	MEX3B	mex-3 RNA binding family member B	-2.18	0.0003
16734524	SNORA54	small nucleolar RNA, H/ACA box 54	-2.18	0.0002
17112969	BEX2	brain expressed X-linked 2	-2.17	0.0011
17063394	KIAA1549	KIAA1549	-2.17	0.0002
16876777	RNF144A	ring finger protein 144A	-2.17	6.21e-05
16965009	USP17L18; USP17L11	ubiquitin specific peptidase 17-like family member 18; ubiquitin specific peptidase 17-like family member 11	-2.17	0.0012
16851230	ANKRD20A5P	ankyrin repeat domain 20 family, member A5, pseudogene	-2.16	0.0004
17094233	KGFLP2	keratinocyte growth factor-like protein 2	-2.16	0.0347
16661856	LINC01226	long intergenic non-protein coding RNA 1226	-2.15	0.0046
16679777	OR2L2	olfactory receptor, family 2, subfamily L, member 2	-2.15	0.0125
16798224	SNRPN; IPW	small nuclear ribonucleoprotein polypeptide N; imprinted in Prader-Willi syndrome (non-protein coding)	-2.15	7.74e-05
16870808	LOC105372321	uncharacterized LOC105372321	-2.15	0.0001
16758442	CCDC62	coiled-coil domain containing 62	-2.14	0.0003
16980245	GYPE	glycophorin E (MNS blood group)	-2.14	0.0001
17044758	MTURN	maturin, neural progenitor differentiation regulator homolog (Xenopus)	-2.14	0.0016
16743104	RAB38	RAB38, member RAS oncogene family	-2.14	0.0004
16874193	CGB1	chorionic gonadotropin, beta polypeptide 1	-2.13	0.0012
16753853	MDM2	MDM2 proto-oncogene, E3 ubiquitin protein ligase	-2.13	0.0002
17072552	SQLE	squalene epoxidase	-2.13	7.26e-05
16935620	LOC101927372	uncharacterized LOC101927372	-2.13	7.63e-05
16865910	ZNF667-AS1	ZNF667 antisense RNA 1 (head to head)	-2.13	0.0005
17005368	ALDH5A1	aldehyde dehydrogenase 5 family, member A1	-2.12	9.81e-05
16665687	DNAJC6	DnaJ (Hsp40) homolog, subfamily C, member 6	-2.12	0.0001
17056143	HOXA6	homeobox A6	-2.12	0.0008
16957263	DPPA4	developmental pluripotency associated 4	-2.11	0.0001
16694359	SCARNA4	small Cajal body-specific RNA 4	-2.11	7.73e-05
16798228	SNORD116-26	small nucleolar RNA, C/D box 116-26	-2.11	0.0007
16871305	ZNF792	zinc finger protein 792	-2.11	0.0002
16923239	PDE9A	phosphodiesterase 9A	-2.1	0.001
16809811	ZNF280D	zinc finger protein 280D	-2.1	0.0117
16923145	ABCG1	ATP binding cassette subfamily G member 1	-2.09	0.0002
16689490	HFM1	HFM1, ATP-dependent DNA helicase homolog	-2.09	0.003
16797415	IGHV3-48; IGHM; IGHV4-31; IGHA1; IGHJ3; IGH; IGHA2; IGHG1	immunoglobulin heavy variable 3-48; immunoglobulin heavy constant mu; immunoglobulin heavy variable 4-31; immunoglobulin heavy constant alpha 1; immunoglobulin heavy joining 3; immunoglobulin heavy locus; immunoglobulin heavy constant alpha 2 (A2m marker); immunoglobulin heavy constant gamma 1 (G1m marker)	-2.09	9.91e-05
17092421	MPDZ	multiple PDZ domain protein	-2.09	0.0001
16800962	SLC27A2	solute carrier family 27 (fatty acid transporter), member 2	-2.09	7.14e-05
16861563	ZNF793	zinc finger protein 793	-2.09	0.0003
16870867	ZNF98	zinc finger protein 98	-2.09	0.0011
16798164	SNORD116-14	small nucleolar RNA, C/D box 116-14	-2.08	9.24e-05
16900286	LINC00342	long intergenic non-protein coding RNA 342	-2.07	0.0002
16696685	SCARNA3	small Cajal body-specific RNA 3	-2.07	0.0016
16851795	LOC646778	uncharacterized LOC646778	-2.07	0.0001
16999321	ZNF608	zinc finger protein 608	-2.07	0.0001
16798238	SNRPN; IPW	small nuclear ribonucleoprotein polypeptide N; imprinted in Prader-Willi syndrome (non-protein coding)	-2.06	9.02e-05
16805629	LOC400464	uncharacterized LOC400464	-2.06	0.0051
16861454	LOC728485	uncharacterized LOC728485	-2.06	0.0005
17051626	MEST	mesoderm specific transcript	-2.05	0.0001
16699174	PTPN14	protein tyrosine phosphatase, non-receptor type 14	-2.05	0.002
16798218	SNRPN; IPW	small nuclear ribonucleoprotein polypeptide N; imprinted in Prader-Willi syndrome (non-protein coding)	-2.05	0.0004
16821047	ZNRF1	zinc and ring finger 1, E3 ubiquitin protein ligase	-2.05	7.77e-05
17077525	CA8	carbonic anhydrase VIII	-2.04	0.0001
16986417	F2RL1	coagulation factor II (thrombin) receptor-like 1	-2.04	0.0048
16706630	FAM213A	family with sequence similarity 213, member A	-2.04	0.0002
16798232	SNRPN; IPW	small nuclear ribonucleoprotein polypeptide N; imprinted in Prader-Willi syndrome (non-protein coding)	-2.04	0.0001
16753607	MSRB3	methionine sulfoxide reductase B3	-2.03	0.0009
17078626	SLC10A5	solute carrier family 10, member 5	-2.03	0.0016
16731693	BACE1-AS	BACE1 antisense RNA	-2.02	0.0003
16724861	SERPING1	serpin peptidase inhibitor, clade G (C1 inhibitor), member 1	-2.02	0.001
16798220	SNRPN; IPW	small nuclear ribonucleoprotein polypeptide N; imprinted in Prader-Willi syndrome (non-protein coding)	-2.02	0.0003
17104051	TRO	trophinin	-2.02	0.0005
17078539	ZNF704	zinc finger protein 704	-2.02	0.0001
16875034	ZNF836	zinc finger protein 836	-2.02	0.0025
17014309	ACAT2	acetyl-CoA acetyltransferase 2	-2.01	0.0002
16689070	DDAH1	dimethylarginine dimethylaminohydrolase 1	-2.01	0.0004
17096423	HEMGN	hemogen	-2.01	0.0001
16682333	MFAP2	microfibrillar associated protein 2	-2.01	0.0063
17109272	PIR; FIGF	pirin; c-fos induced growth factor (vascular endothelial growth factor D)	-2.01	0.0015
16798216	SNORD116-24	small nucleolar RNA, C/D box 116-24	-2.01	0.0001
16947551	C3orf80	chromosome 3 open reading frame 80	-2	0.0036
17055216	ICA1	islet cell autoantigen 1	-2	0.0003
16726945	EHBP1L1	EH domain binding protein 1 like 1	2	0.0023
16780896	LIG4	ligase IV, DNA, ATP-dependent	2	0.001
16745002	MPZL2	myelin protein zero-like 2	2	0.0011
16868187	MYO1F	myosin IF	2	0.0001
16707009	PAPSS2	3-phosphoadenosine 5-phosphosulfate synthase 2	2.01	0.0006
16817824	CORO1A	coronin, actin binding protein, 1A	2.01	0.0002
17002141	HAVCR2	hepatitis A virus cellular receptor 2	2.01	0.0003
16939127	MYD88	myeloid differentiation primary response 88	2.01	0.0003
16752703	NAB2	NGFI-A binding protein 2 (EGR1 binding protein 2)	2.01	0.0005
17075973	DUSP4	dual specificity phosphatase 4	2.02	0.0007
16926460	ITGB2	integrin, beta 2 (complement component 3 receptor 3 and 4 subunit)	2.02	0.0009
17104832	NHSL2	NHS-like 2	2.02	0.0002
17012207	SMPDL3A	sphingomyelin phosphodiesterase, acid-like 3A	2.02	0.0006
17045917	UPP1	uridine phosphorylase 1	2.02	0.0002
16982047	ACSL1	acyl-CoA synthetase long-chain family member 1	2.03	0.0001
16903771	CACNB4	calcium channel, voltage-dependent, beta 4 subunit	2.03	0.0005
17070456	CA2	carbonic anhydrase II	2.03	0.0005
16721593	PPFIBP2	PTPRF interacting protein, binding protein 2 (liprin beta 2)	2.03	0.0002
17076285	RAB11FIP1	RAB11 family interacting protein 1 (class I)	2.03	0.0005
16916901	RASSF2	Ras association (RalGDS/AF-6) domain family member 2	2.03	9.07e-05
16910728	SIRPA	signal-regulatory protein alpha	2.03	0.0002
16789149	TNFAIP2	tumor necrosis factor, alpha-induced protein 2	2.03	0.0004
17068170	ADAM9	ADAM metallopeptidase domain 9	2.04	8.27e-05
16740539	AP5B1	adaptor-related protein complex 5, beta 1 subunit	2.04	0.0164
16928533	ASPHD2	aspartate beta-hydroxylase domain containing 2	2.04	0.0017
16718047	CALHM2	calcium homeostasis modulator 2	2.04	0.0003
16869350	DNASE2	deoxyribonuclease II, lysosomal	2.04	0.0001
17012047	DCBLD1	discoidin, CUB and LCCL domain containing 1	2.04	0.0003
16900098	IGKV3D-15; IGKV2-29; IGK; IGKJ3	immunoglobulin kappa variable 3D-15 (gene/pseudogene); immunoglobulin kappa variable 2-29 (gene/pseudogene); immunoglobulin kappa locus; immunoglobulin kappa joining 3	2.04	0.0132
17088116	MIR4668	microRNA 4668	2.04	0.0121
17101828	REPS2	RALBP1 associated Eps domain containing 2	2.04	0.0004
16948540	B3GNT5	UDP-GlcNAc:betaGal beta-1,3-N-acetylglucosaminyltransferase 5	2.04	0.0003
16899657	CAPG	capping protein (actin filament), gelsolin-like	2.05	0.0076
16698697	FCMR	Fc fragment of IgM receptor	2.05	0.0008
17097388	FKBP15	FK506 binding protein 15	2.05	9.62e-05
16884629	IL1RN	interleukin 1 receptor antagonist	2.05	0.0013
17007292	HLA-DQA2; HLA-DQA1	major histocompatibility complex, class II, DQ alpha 2; major histocompatibility complex, class II, DQ alpha 1	2.05	0.0001
17052550	MGAM2	maltase-glucoamylase 2 (putative)	2.05	0.0007
16694764	SH2D2A	SH2 domain containing 2A	2.05	0.0047
16755692	GAS2L3	growth arrest-specific 2 like 3	2.06	0.0001
16837326	PRKAR1A	protein kinase, cAMP-dependent, regulatory, type I, alpha	2.06	8.82e-05
17007299	PSMB8-AS1; PSMB9	PSMB8 antisense RNA 1 (head to head); proteasome subunit beta 9	2.06	0.0065
16843446	SLFN12L	schlafen family member 12-like	2.06	0.0091
17056817	TRGV9; TRGC1; TRGJP	T cell receptor gamma variable 9; T cell receptor gamma constant 1; T cell receptor gamma joining P	2.06	0.0005
17063945	LOC100507507	uncharacterized LOC100507507	2.06	0.0003
17054823	ACTB	actin, beta	2.07	0.0004
16836021	ABCC3	ATP binding cassette subfamily C member 3	2.07	0.0003
16717469	CHUK	conserved helix-loop-helix ubiquitous kinase	2.07	9.42e-05
16883624	IL1R2	interleukin 1 receptor, type II	2.07	0.0004
16743517	MAML2	mastermind-like transcriptional coactivator 2	2.07	0.0006
17087397	NANS	N-acetylneuraminic acid synthase	2.07	0.0003
17118411	LOC100132154	putative ankyrin repeat domain-containing protein 30B-like	2.07	0.0005
16808066	TGM5	transglutaminase 5	2.07	0.0008
17087308	TDRD7	tudor domain containing 7	2.07	0.0002
16833420	CCL4	chemokine (C-C motif) ligand 4	2.08	0.0011
17081124	FAM49B	family with sequence similarity 49, member B	2.08	0.0001
17016995	FLOT1	flotillin 1	2.08	0.0001
17075248	GFRA2	GDNF family receptor alpha 2	2.08	0.0108
16809219	TNFAIP8L3	tumor necrosis factor, alpha-induced protein 8-like 3	2.08	0.0048
17080554	ENPP2	ectonucleotide pyrophosphatase/phosphodiesterase 2	2.09	0.0002
16671914	LMNA	lamin A/C	2.09	0.0009
17001063	SPRY4	sprouty RTK signaling antagonist 4	2.09	0.0004
17080342	TRPS1	trichorhinophalangeal syndrome I	2.09	0.0005
16853631	EPB41L3	erythrocyte membrane protein band 4.1-like 3	2.1	0.0001
16864751	FPR2	formyl peptide receptor 2	2.1	0.0026
17101543	TMSB4X	thymosin beta 4, X-linked	2.1	0.0003
16917030	TRMT6	tRNA methyltransferase 6	2.1	0.0001
17000208	VTRNA2-1	vault RNA 2-1	2.1	0.0002
16979482	ANXA5	annexin A5	2.11	0.0002
16786587	FOS	FBJ murine osteosarcoma viral oncogene homolog	2.11	0.0002
17118048	LOC100133299	GALI1870	2.11	0.0005
16683377	ID3	inhibitor of DNA binding 3, dominant negative helix-loop-helix protein	2.11	0.0003
17017907	HLA-DQB1	major histocompatibility complex, class II, DQ beta 1	2.11	7.26e-05
16853527	MYOM1	myomesin 1	2.11	0.0029
16703242	OTUD1	OTU deubiquitinase 1	2.11	0.0017
16793532	RTN1	reticulon 1	2.11	0.0024
17023484	ARHGAP18	Rho GTPase activating protein 18	2.11	7.68e-05
16997199	ENC1	ectodermal-neural cortex 1 (with BTB domain)	2.12	0.0072
17052552	MGAM2	maltase-glucoamylase 2 (putative)	2.12	0.0045
17015652	NEDD9	neural precursor cell expressed, developmentally down-regulated 9	2.12	7.94e-05
17118190	NEDD9	neural precursor cell expressed, developmentally down-regulated 9	2.12	7.94e-05
17095703	NFIL3	nuclear factor, interleukin 3 regulated	2.12	0.0001
16669566	RNVU1-3	RNA, variant U1 small nuclear 3	2.13	0.002
16670197	RNVU1-3	RNA, variant U1 small nuclear 3	2.13	0.002
16757427	TPCN1	two pore segment channel 1	2.13	8.92e-05
16763764	VDR	vitamin D (1,25- dihydroxyvitamin D3) receptor	2.13	0.0007
16848619	CD300LF	CD300 molecule-like family member f	2.14	0.0001
16925155	IL10RB-AS1	IL10RB antisense RNA 1 (head to head)	2.14	0.0009
17101876	SCML1	sex comb on midleg-like 1 (Drosophila)	2.14	0.0016
16925023	SNORA80A	small nucleolar RNA, H/ACA box 80A	2.14	0.0003
17056248	CPVL	carboxypeptidase, vitellogenic-like	2.15	0.0002
16668772	CTTNBP2NL	CTTNBP2 N-terminal like	2.15	7.62e-05
17044485	HOTAIRM1	HOXA transcript antisense RNA, myeloid-specific 1	2.15	0.0007
16840321	NLRP1	NLR family, pyrin domain containing 1	2.15	0.0002
17007307	PSMB9	proteasome subunit beta 9	2.15	0.0006
16848583	CD300LB	CD300 molecule-like family member b	2.16	0.0029
16914449	CD40	CD40 molecule, TNF receptor superfamily member 5	2.16	0.0003
16689969	DPYD	dihydropyrimidine dehydrogenase	2.16	5.8e-05
16752103	PDE1B	phosphodiesterase 1B, calmodulin-dependent	2.16	7.19e-05
16874339	RRAS	related RAS viral (r-ras) oncogene homolog	2.16	0.0003
16906285	CALCRL	calcitonin receptor like receptor	2.17	0.0009
17052548	MGAM2	maltase-glucoamylase 2 (putative)	2.17	0.0002
16670212	RNVU1-14	RNA, variant U1 small nuclear 14	2.17	0.0003
16830577	CD68	CD68 molecule	2.18	6.54e-05
17075776	PBK	PDZ binding kinase	2.18	0.0001
16824046	CPPED1	calcineurin-like phosphoesterase domain containing 1	2.19	5.18e-05
16899079	DGUOK-AS1	DGUOK antisense RNA 1	2.19	0.0001
16684056	FGR	FGR proto-oncogene, Src family tyrosine kinase	2.19	0.002
16674742	NPL	N-acetylneuraminate pyruvate lyase (dihydrodipicolinate synthase)	2.19	0.0002
16961637	NCEH1	neutral cholesterol ester hydrolase 1	2.19	0.0007
17019565	NFKBIE	nuclear factor of kappa light polypeptide gene enhancer in B-cells inhibitor, epsilon	2.19	0.0003
16782318	CMTM5	CKLF-like MARVEL transmembrane domain containing 5	2.2	0.0054
16839019	SLC16A3	solute carrier family 16 (monocarboxylate transporter), member 3	2.2	0.0001
16794158	ZFP36L1	ZFP36 ring finger protein-like 1	2.2	0.0006
16862563	CEACAM6	carcinoembryonic antigen-related cell adhesion molecule 6 (non-specific cross reacting antigen)	2.21	0.0121
16661149	CD52	CD52 molecule	2.21	6.71e-05
16875340	LILRB3; LILRB2; LILRA6	leukocyte immunoglobulin-like receptor, subfamily B (with TM and ITIM domains), member 3; leukocyte immunoglobulin-like receptor, subfamily B (with TM and ITIM domains), member 2; leukocyte immunoglobulin-like receptor, subfamily A (with TM domain), member 6	2.21	8.72e-05
16684144	PTAFR	platelet-activating factor receptor	2.21	0.0002
17047652	PTPN12	protein tyrosine phosphatase, non-receptor type 12	2.21	0.0002
17108931	PUDP	pseudouridine 5-phosphatase	2.21	0.0001
16711562	SFMBT2	Scm-like with four mbt domains 2	2.21	6.02e-05
16802232	SMAD6	SMAD family member 6	2.21	9.96e-05
17004859	TMEM170B	transmembrane protein 170B	2.21	0.0001
16966022	LOC105374412	uncharacterized LOC105374412	2.21	0.0001
16817328	APOBR	apolipoprotein B receptor	2.22	5.38e-05
16787208	GPR65	G protein-coupled receptor 65	2.22	0.0002
16782687	IRF9	interferon regulatory factor 9	2.22	7.07e-05
16672478	SLAMF8	SLAM family member 8	2.22	0.0001
16926274	LOC101928576; LOC105377138	uncharacterized LOC101928576; uncharacterized LOC105377138	2.22	0.0009
17064282	LOC105375566	uncharacterized LOC105375566	2.22	7.86e-05
17088652	GSN	gelsolin	2.23	0.0002
16992664	HRH2	histamine receptor H2	2.23	0.0002
16754966	LINC00936	long intergenic non-protein coding RNA 936	2.23	0.0073
17014651	CCR6	chemokine (C-C motif) receptor 6	2.24	0.0001
16801835	LACTB	lactamase, beta	2.24	0.0001
16841083	PIK3R5	phosphoinositide-3-kinase, regulatory subunit 5	2.24	0.0001
16961616	TNFSF10	tumor necrosis factor (ligand) superfamily, member 10	2.24	5.38e-05
16863041	BCL3; MIR8085	B-cell CLL/lymphoma 3; microRNA 8085	2.25	5.28e-05
16875414	LILRB2	leukocyte immunoglobulin-like receptor, subfamily B (with TM and ITIM domains), member 2	2.25	0.0007
16700872	LYST	lysosomal trafficking regulator	2.25	0.0003
16828826	COTL1	coactosin-like F-actin binding protein 1	2.26	5.14e-05
16752185	METTL7B	methyltransferase like 7B	2.26	0.0144
16935537	NAGA	N-acetylgalactosaminidase, alpha-	2.26	4.89e-05
16789573	PLD4	phospholipase D family, member 4	2.26	9.46e-05
16909724	ARL4C	ADP-ribosylation factor like GTPase 4C	2.27	0.0009
16710548	PTPRE	protein tyrosine phosphatase, receptor type, E	2.27	6.36e-05
16760868	SLC2A3	solute carrier family 2 (facilitated glucose transporter), member 3	2.27	4.82e-05
17084363	ANXA2P2	annexin A2 pseudogene 2	2.28	4.4e-05
16748248	CLEC12A	C-type lectin domain family 12, member A	2.28	7.03e-05
17093038	MOB3B	MOB kinase activator 3B	2.28	0.0013
16698543	RAB29	RAB29, member RAS oncogene family	2.28	0.0002
16947053	SUCNR1	succinate receptor 1	2.28	7.24e-05
16865540	FCAR	Fc fragment of IgA receptor	2.29	0.0002
16806145	ATP10A	ATPase, class V, type 10A	2.3	4.34e-05
16698234	FMOD	fibromodulin	2.3	0.0037
16765537	GPR84	G protein-coupled receptor 84	2.3	0.0032
16943656	HHLA2	HERV-H LTR-associating 2	2.3	6.25e-05
16715361	P4HA1	prolyl 4-hydroxylase, alpha polypeptide I	2.3	6.43e-05
17064054	TPK1	thiamin pyrophosphokinase 1	2.3	0.0008
16834766	GRN	granulin	2.31	4.34e-05
16698980	SLC30A1	solute carrier family 30 (zinc transporter), member 1	2.31	0.0003
16781285	GAS6	growth arrest-specific 6	2.32	5.33e-05
17062945	LINC-PINT	long intergenic non-protein coding RNA, p53 induced transcript	2.32	5.7e-05
17052532	MGAM2	maltase-glucoamylase 2 (putative)	2.32	0.0024
16960560	P2RY14	purinergic receptor P2Y, G-protein coupled, 14	2.32	8.42e-05
16725041	FAM111B	family with sequence similarity 111, member B	2.33	3.91e-05
17074533	LINC00599	long intergenic non-protein coding RNA 599	2.33	5.57e-05
16888106	OSBPL6	oxysterol binding protein-like 6	2.33	8.55e-05
16847393	SCARNA20	small Cajal body-specific RNA 20	2.33	5.92e-05
16723653	CD44	CD44 molecule (Indian blood group)	2.34	0.0002
17010175	OGFRL1	opioid growth factor receptor-like 1	2.34	3.75e-05
16977309	RASGEF1B	RasGEF domain family member 1B	2.34	0.0002
16906733	STK17B	serine/threonine kinase 17b	2.34	5.06e-05
17077826	MYBL1	v-myb avian myeloblastosis viral oncogene homolog-like 1	2.35	7.96e-05
16672306	CD1D	CD1d molecule	2.36	0.0002
16840113	CXCL16	chemokine (C-X-C motif) ligand 16	2.36	0.0015
17093042	C9orf72	chromosome 9 open reading frame 72	2.36	0.0001
16748262	CLEC12B	C-type lectin domain family 12, member B	2.36	5.33e-05
16666982	LRRC8C	leucine rich repeat containing 8 family, member C	2.36	0.0001
17018025	HLA-DOA	major histocompatibility complex, class II, DO alpha	2.36	9.83e-05
16852622	MALT1	MALT1 paracaspase	2.36	3.67e-05
17056849	TRGV3; TRGC2	T cell receptor gamma variable 3; T cell receptor gamma constant 2	2.36	0.0002
16978779	DKK2	dickkopf WNT signaling pathway inhibitor 2	2.37	0.0001
17084866	GLIPR2	GLI pathogenesis-related 2	2.37	0.0006
16677723	HLX	H2.0-like homeobox	2.37	9.52e-05
16692834	CTSS	cathepsin S	2.38	5.46e-05
16933766	OSM	oncostatin M	2.38	0.0007
17070013	RDH10	retinol dehydrogenase 10 (all-trans)	2.38	6.5e-05
17102129	SAT1	spermidine/spermine N1-acetyltransferase 1	2.38	9.38e-05
17011302	AIM1	absent in melanoma 1	2.39	0.0001
16848609	CD300E	CD300e molecule	2.39	9.23e-05
17114970	GABRE	gamma-aminobutyric acid (GABA) A receptor, epsilon	2.39	0.0002
16858169	PDE4A	phosphodiesterase 4A, cAMP-specific	2.39	5.79e-05
16726489	RPS6KA4	ribosomal protein S6 kinase, 90kDa, polypeptide 4	2.39	0.0033
16961250	WDR49	WD repeat domain 49	2.39	0.0005
16854486	DSC2	desmocollin 2	2.4	0.0003
16683624	RUNX3	runt-related transcription factor 3	2.4	3.73e-05
16843456	SLFN14	schlafen family member 14	2.4	0.0001
16903931	CYTIP	cytohesin 1 interacting protein	2.41	0.0001
16807763	EHD4	EH domain containing 4	2.41	3.33e-05
16864661	SIGLEC17P	sialic acid binding Ig-like lectin 17, pseudogene	2.41	0.0112
17086540	CTSL	cathepsin L	2.42	0.0331
16672838	FCER1G	Fc fragment of IgE, high affinity I, receptor for; gamma polypeptide	2.42	3.76e-05
16876822	ID2	inhibitor of DNA binding 2, dominant negative helix-loop-helix protein	2.42	0.0056
16802190	MAP2K1	mitogen-activated protein kinase kinase 1	2.42	6.46e-05
16951150	SH3BP5	SH3-domain binding protein 5 (BTK-associated)	2.42	5.25e-05
16870200	BST2	bone marrow stromal cell antigen 2	2.43	0.0001
16747958	CLEC6A	C-type lectin domain family 6, member A	2.43	0.0006
16909081	DOCK10	dedicator of cytokinesis 10	2.43	3.52e-05
16812685	HOMER2	homer scaffolding protein 2	2.43	3.21e-05
17051376	TSPAN33	tetraspanin 33	2.43	0.0002
16979133	CAMK2D	calcium/calmodulin-dependent protein kinase II delta	2.44	3.06e-05
16911382	LAMP5	lysosomal-associated membrane protein family, member 5	2.44	7.51e-05
16841561	PMP22	peripheral myelin protein 22	2.44	4.92e-05
16996298	IL6ST	interleukin 6 signal transducer	2.45	8.05e-05
16817692	MVP	major vault protein	2.45	6.54e-05
17089622	TMSB4XP4	thymosin beta 4, X-linked pseudogene 4	2.45	0.0008
16990199	VTRNA1-1	vault RNA 1-1	2.45	0.0013
16743912	CARD16	caspase recruitment domain family, member 16	2.46	0.0003
16781610	RNASE2	ribonuclease, RNase A family, 2 (liver, eosinophil-derived neurotoxin)	2.46	2.98e-05
16741130	ACY3	aminoacylase 3	2.48	3.53e-05
17002712	KCNMB1	potassium channel subfamily M regulatory beta subunit 1	2.48	0.0001
16864401	SIGLEC16	sialic acid binding Ig-like lectin 16 (gene/pseudogene)	2.48	0.0216
16927633	SDF2L1	stromal cell-derived factor 2-like 1	2.48	0.0007
16716469	HTR7	5-hydroxytryptamine (serotonin) receptor 7, adenylate cyclase-coupled	2.5	0.0008
17101081	CSF2RA	colony stimulating factor 2 receptor, alpha, low-affinity (granulocyte-macrophage)	2.5	3.33e-05
16820937	HP	haptoglobin	2.5	0.0014
16943467	NFKBIZ	nuclear factor of kappa light polypeptide gene enhancer in B-cells inhibitor, zeta	2.5	7.31e-05
16855127	SMAD7	SMAD family member 7	2.5	0.0004
16768341	ATP2B1	ATPase, Ca++ transporting, plasma membrane 1	2.51	2.81e-05
16770124	HVCN1	hydrogen voltage gated channel 1	2.51	6.36e-05
17105076	P2RY10	purinergic receptor P2Y, G-protein coupled, 10	2.51	0.0001
17075395	EGR3	early growth response 3	2.52	5.49e-05
16704320	RASSF4	Ras association (RalGDS/AF-6) domain family member 4	2.52	0.0015
16676819	CR1	complement component (3b/4b) receptor 1 (Knops blood group)	2.53	2.97e-05
16761877	EPS8	epidermal growth factor receptor pathway substrate 8	2.53	4.93e-05
17052534	MGAM2	maltase-glucoamylase 2 (putative)	2.53	0.0016
16852886	SERPINB10	serpin peptidase inhibitor, clade B (ovalbumin), member 10	2.53	6.02e-05
16700686	LOC101927851	uncharacterized LOC101927851	2.53	0.0002
16675301	RGS1	regulator of G-protein signaling 1	2.54	6.5e-05
16659238	TNFRSF1B; MIR4632	tumor necrosis factor receptor superfamily, member 1B; microRNA 4632	2.54	2.39e-05
16871546	TYROBP	TYRO protein tyrosine kinase binding protein	2.54	3.75e-05
16755542	APAF1	apoptotic peptidase activating factor 1	2.55	2.31e-05
17059165	HGF	hepatocyte growth factor (hepapoietin A; scatter factor)	2.56	6.66e-05
16875262	OSCAR	osteoclast associated, immunoglobulin-like receptor	2.56	0.0002
16848219	ABCA6	ATP binding cassette subfamily A member 6	2.57	0.0005
16941344	ALAS1	5-aminolevulinate synthase 1	2.58	2.73e-05
17070061	LY96	lymphocyte antigen 96	2.58	4.24e-05
16696217	SELP	selectin P (granule membrane protein 140kDa, antigen CD62)	2.58	2.36e-05
16862439	AXL	AXL receptor tyrosine kinase	2.59	0.0005
16890837	SLC11A1	solute carrier family 11 (proton-coupled divalent metal ion transporter), member 1	2.59	0.0005
16896620	HNRNPLL	heterogeneous nuclear ribonucleoprotein L-like	2.6	0.0003
16923031	MX1	MX dynamin-like GTPase 1	2.61	8.85e-05
16707567	FFAR4	free fatty acid receptor 4	2.62	0.0005
16756286	C12orf75	chromosome 12 open reading frame 75	2.63	0.0011
16968447	GPAT3	glycerol-3-phosphate acyltransferase 3	2.63	2.74e-05
16708038	PI4K2A	phosphatidylinositol 4-kinase type 2 alpha	2.63	6.74e-05
16733473	ST14	suppression of tumorigenicity 14 (colon carcinoma)	2.63	0.0002
16975203	TLR10	toll-like receptor 10	2.63	0.003
16716918	BLNK	B-cell linker	2.64	2.91e-05
17098506	FAM129B	family with sequence similarity 129, member B	2.64	4.07e-05
16818820	NOD2	nucleotide-binding oligomerization domain containing 2	2.64	0.0001
16718719	SHTN1	shootin 1	2.64	0.0002
17052530	MGAM2	maltase-glucoamylase 2 (putative)	2.65	0.0001
17067696	NRG1	neuregulin 1	2.65	0.001
16907488	RAPH1	Ras association (RalGDS/AF-6) and pleckstrin homology domains 1	2.65	2.44e-05
16985094	ZSWIM6	zinc finger, SWIM-type containing 6	2.65	3.31e-05
17013784	ARMT1	acidic residue methyltransferase 1	2.66	2.46e-05
16923686	ITGB2-AS1	ITGB2 antisense RNA 1	2.66	0.0117
16858710	JUNB	jun B proto-oncogene	2.66	2.43e-05
16726065	LGALS12	lectin, galactoside-binding, soluble, 12	2.66	0.0001
17044253	GPNMB	glycoprotein (transmembrane) nmb	2.68	2.21e-05
16675323	RGS2	regulator of G-protein signaling 2	2.68	0.0001
16725065	DTX4	deltex 4, E3 ubiquitin ligase	2.71	0.0002
16980974	FAM198B	family with sequence similarity 198, member B	2.71	2.69e-05
17095345	SLC28A3	solute carrier family 28 (concentrative nucleoside transporter), member 3	2.71	4.4e-05
17059451	ABCB4	ATP binding cassette subfamily B member 4	2.72	9.52e-05
17014364	IGF2R	insulin-like growth factor 2 receptor	2.72	5.55e-05
16875219	NLRP12	NLR family, pyrin domain containing 12	2.72	0.0002
17071144	SDC2	syndecan 2	2.72	8.51e-05
17081347	TMEM71; LRRC6	transmembrane protein 71; leucine rich repeat containing 6	2.72	0.0005
16812344	BCL2A1	BCL2-related protein A1	2.73	0.0003
16883715	IL18R1	interleukin 18 receptor 1	2.73	5.23e-05
16671457	IL6R	interleukin 6 receptor	2.73	4.27e-05
16913666	PPP1R16B	protein phosphatase 1, regulatory subunit 16B	2.73	1.72e-05
16901974	IL1A	interleukin 1 alpha	2.74	0.0001
16976644	JCHAIN	joining chain of multimeric IgA and IgM	2.74	2.83e-05
16919567	SDC4	syndecan 4	2.74	0.0001
16803370	LOC105370905	uncharacterized LOC105370905	2.74	1.65e-05
16912362	ID1	inhibitor of DNA binding 1, dominant negative helix-loop-helix protein	2.76	0.0046
16669180	PTGFRN	prostaglandin F2 receptor inhibitor	2.76	7.97e-05
16952431	CX3CR1	chemokine (C-X3-C motif) receptor 1	2.78	4.34e-05
16835158	ITGB3	integrin beta 3	2.8	3.24e-05
16922959	MX2	MX dynamin-like GTPase 2	2.81	0.0038
16781602	RNASE3	ribonuclease, RNase A family, 3	2.81	1.52e-05
16707673	TBC1D12	TBC1 domain family, member 12	2.81	0.001
16990534	ARHGAP26-IT1	ARHGAP26 intronic transcript 1	2.82	0.0151
16926754	S100B	S100 calcium binding protein B	2.82	0.0003
16742454	PAK1	p21 protein (Cdc42/Rac)-activated kinase 1	2.83	1.73e-05
16765542	ZNF385A	zinc finger protein 385A	2.83	1.73e-05
16865370	LILRA2	leukocyte immunoglobulin-like receptor, subfamily A (with TM domain), member 2	2.86	3.8e-05
17109893	CXorf21	chromosome X open reading frame 21	2.87	0.0002
17043856	AHR	aryl hydrocarbon receptor	2.88	1.39e-05
16977537	HPSE	heparanase	2.88	1.85e-05
16760889	C3AR1	complement component 3a receptor 1	2.9	8.22e-05
16983373	FAM105A	family with sequence similarity 105, member A	2.91	1.29e-05
16998510	LOC100652833	putative POM121-like protein 1-like	2.92	4.61e-05
16971631	TLR2	toll-like receptor 2	2.92	3.28e-05
17005001	CD83	CD83 molecule	2.93	1.34e-05
16778887	KIAA0226L	KIAA0226-like	2.93	0.0019
16779024	RCBTB2	regulator of chromosome condensation (RCC1) and BTB (POZ) domain containing protein 2	2.93	2.59e-05
16889048	LOC101927482	uncharacterized LOC101927482	2.93	1.57e-05
16913507	BPI	bactericidal/permeability-increasing protein	2.94	0.006
16848593	CD300C	CD300c molecule	2.94	0.0005
16796060	LGMN	legumain	2.95	0.0007
16984287	PTGER4	prostaglandin E receptor 4 (subtype EP4)	2.95	0.0001
16738803	TCN1	transcobalamin I (vitamin B12 binding protein, R binder family)	2.95	5.31e-05
16738897	SLC15A3	solute carrier family 15 (oligopeptide transporter), member 3	2.96	0.0028
16819563	ADGRG3	adhesion G protein-coupled receptor G3	2.97	0.0004
17049312	PILRA	paired immunoglobin-like type 2 receptor alpha	2.97	5.58e-05
16916462	SIRPB2	signal-regulatory protein beta 2	2.97	0.0003
16786625	FLVCR2; TTLL5	feline leukemia virus subgroup C cellular receptor family, member 2; tubulin tyrosine ligase-like family member 5	2.98	5.37e-05
16747417	CD4	CD4 molecule	2.99	4.78e-05
16942511	KBTBD8	kelch repeat and BTB (POZ) domain containing 8	2.99	2.49e-05
16982083	SLED1	proteoglycan 3 pseudogene	2.99	0.0001
16920762	CTSZ	cathepsin Z	3	1.34e-05
16676150	BTG2	BTG family, member 2	3.01	1.47e-05
16950216	IL5RA	interleukin 5 receptor, alpha	3.01	1.33e-05
16674927	RGL1	ral guanine nucleotide dissociation stimulator-like 1	3.01	2.32e-05
17024144	IFNGR1	interferon gamma receptor 1	3.02	1.09e-05
16880669	LGALSL	lectin, galactoside-binding-like	3.02	4.07e-05
17013795	CCDC170	coiled-coil domain containing 170	3.03	5.61e-05
16960573	P2RY13	purinergic receptor P2Y, G-protein coupled, 13	3.04	2.19e-05
16879174	QPCT	glutaminyl-peptide cyclotransferase	3.05	1.41e-05
17017998	HLA-DMB	major histocompatibility complex, class II, DM beta	3.09	1.46e-05
16996234	PLPP1	phospholipid phosphatase 1	3.1	1.59e-05
17019728	PLA2G7	phospholipase A2, group VII (platelet-activating factor acetylhydrolase, plasma)	3.12	5.53e-05
16850923	RAB31	RAB31, member RAS oncogene family	3.12	9.75e-06
16760928	CLEC4E	C-type lectin domain family 4, member E	3.13	7.53e-05
16690566	SORT1	sortilin 1	3.13	1.13e-05
16911835	RIN2	Ras and Rab interactor 2	3.14	2.68e-05
16872602	CEACAM4	carcinoembryonic antigen-related cell adhesion molecule 4	3.15	0.0006
16944344	ARHGAP31	Rho GTPase activating protein 31	3.15	1.11e-05
16695422	SLAMF1	signaling lymphocytic activation molecule family member 1	3.15	3.44e-05
16933760	LIF	leukemia inhibitory factor	3.17	4.82e-05
16996983	NAIP	NLR family, apoptosis inhibitory protein	3.17	1.55e-05
16747004	TIGAR	TP53 induced glycolysis regulatory phosphatase	3.17	0.0011
16782187	MMP14	matrix metallopeptidase 14 (membrane-inserted)	3.18	1.15e-05
16786801	VASH1	vasohibin 1	3.18	1.82e-05
16861997	ZFP36	ZFP36 ring finger protein	3.18	9.42e-06
16870394	LRRC25	leucine rich repeat containing 25	3.19	0.0002
16839177	METRNL	meteorin, glial cell differentiation regulator-like	3.19	2.97e-05
17087790	SLC44A1	solute carrier family 44 (choline transporter), member 1	3.19	1.38e-05
16749782	FGD4	FYVE, RhoGEF and PH domain containing 4	3.2	1.04e-05
17053384	GIMAP4	GTPase, IMAP family member 4	3.2	4.02e-05
16728560	IL18BP	interleukin 18 binding protein	3.2	9.42e-06
16917849	THBD	thrombomodulin	3.21	3.42e-05
16943107	CRYBG3	crystallin beta-gamma domain containing 3	3.22	2.58e-05
17075271	DOK2	docking protein 2	3.22	1.01e-05
17007266	HLA-DQA1	major histocompatibility complex, class II, DQ alpha 1	3.22	9.3e-06
16693272	S100A10	S100 calcium binding protein A10	3.22	2.06e-05
17109342	AP1S2	adaptor-related protein complex 1 sigma 2 subunit	3.23	0.0002
17058719	NCF1C	neutrophil cytosolic factor 1C pseudogene	3.25	0.0048
17013554	UST	uronyl-2-sulfotransferase	3.25	8.37e-05
16743890	CASP1	caspase 1	3.26	1.94e-05
17115850	CSF2RA	colony stimulating factor 2 receptor, alpha, low-affinity (granulocyte-macrophage)	3.26	3.06e-05
16761350	KLRC3	killer cell lectin-like receptor subfamily C, member 3	3.26	0.0007
16852760	TNFRSF11A	tumor necrosis factor receptor superfamily, member 11a, NFKB activator	3.27	1.17e-05
16969558	SGMS2	sphingomyelin synthase 2	3.29	0.0004
16763608	PCED1B-AS1	PCED1B antisense RNA 1	3.3	0.0005
16873060	PLAUR	plasminogen activator, urokinase receptor	3.3	1.96e-05
16734862	HBG1; BGLT3	hemoglobin, gamma A; beta globin locus transcript 3 (non-protein coding)	3.33	0.0003
16810065	ANXA2	annexin A2	3.34	5.87e-05
16753914	LYZ	lysozyme	3.34	8.73e-06
16769463	SLC41A2	solute carrier family 41 (magnesium transporter), member 2	3.34	1.95e-05
16832880	ADAP2	ArfGAP with dual PH domains 2	3.39	1.02e-05
16843167	EVI2A	ecotropic viral integration site 2A	3.39	4.85e-05
16909303	PID1	phosphotyrosine interaction domain containing 1	3.39	0.0003
16979339	PDE5A	phosphodiesterase 5A, cGMP-specific	3.41	0.0001
16661497	THEMIS2	thymocyte selection associated family member 2	3.41	4e-05
16835556	ABI3	ABI family, member 3	3.42	7.33e-06
17000156	DCANP1; TIFAB	dendritic cell-associated nuclear protein; TRAF-interacting protein with forkhead-associated domain, family member B	3.43	3.31e-05
17056984	INHBA	inhibin beta A	3.43	0.0066
16666977	LRRC8C	leucine rich repeat containing 8 family, member C	3.43	0.0003
16716341	ANKRD22	ankyrin repeat domain 22	3.47	0.0004
16840486	ASGR2	asialoglycoprotein receptor 2	3.49	0.0001
16958506	OSBPL11	oxysterol binding protein-like 11	3.51	3.8e-05
16738465	PRG2	proteoglycan 2, bone marrow (natural killer cell activator, eosinophil granule major basic protein)	3.53	1.07e-05
16724633	PTPRJ	protein tyrosine phosphatase, receptor type, J	3.54	8.86e-06
16696416	TNFSF18	tumor necrosis factor (ligand) superfamily, member 18	3.54	0.0016
16856275	AZU1	azurocidin 1	3.57	1.09e-05
16852905	SERPINB8; HMSD	serpin peptidase inhibitor, clade B (ovalbumin), member 8; histocompatibility (minor) serpin domain containing	3.57	6.08e-06
16821621	IRF8	interferon regulatory factor 8	3.58	8.35e-06
16915395	TUBB1	tubulin, beta 1 class VI	3.59	5.98e-06
16819257	MT1H	metallothionein 1H	3.63	7.31e-06
16818272	ITGAX	integrin alpha X	3.64	0.0005
16738845	MS4A4E	membrane-spanning 4-domains, subfamily A, member 4E	3.64	0.0002
16985748	LOC728093; LOC643784; LOC102725182	putative POM121-like protein 1-like; NLR family, apoptosis inhibitory protein pseudogene	3.64	0.0005
17017018	IER3	immediate early response 3	3.67	1.53e-05
16947904	SKIL	SKI-like proto-oncogene	3.67	4.12e-05
16669169	CD2	CD2 molecule	3.71	6.54e-05
16989496	TGFBI	transforming growth factor, beta-induced, 68kDa	3.73	9.84e-06
16826639	CES1; CES1P1	carboxylesterase 1; carboxylesterase 1 pseudogene 1	3.74	0.0005
16836624	MIR21; VMP1	microRNA 21; vacuole membrane protein 1	3.74	5.2e-06
16903897	NR4A2	nuclear receptor subfamily 4, group A, member 2	3.74	0.0004
16916485	SIRPD	signal-regulatory protein delta	3.76	6.5e-05
16879250	GALM	galactose mutarotase (aldose 1-epimerase)	3.77	6.11e-06
16799315	THBS1	thrombospondin 1	3.79	6.54e-06
16697370	PTGS2	prostaglandin-endoperoxide synthase 2 (prostaglandin G/H synthase and cyclooxygenase)	3.8	4e-05
16752715	LRP1	LDL receptor related protein 1	3.81	7.84e-06
16919242	MAFB	v-maf avian musculoaponeurotic fibrosarcoma oncogene homolog B	3.82	0.0018
16784381	LGALS3	lectin, galactoside-binding, soluble, 3	3.86	0.0003
16856284	PRTN3	proteinase 3	3.87	4.42e-06
17061881	DOCK4	dedicator of cytokinesis 4	3.88	1.26e-05
16957795	CD80	CD80 molecule	3.89	8.57e-06
16917859	CD93	CD93 molecule	3.93	4.1e-06
16781606	ECRP	ribonuclease, RNase A family, 2 (liver, eosinophil-derived neurotoxin) pseudogene	3.96	1.37e-05
16791427	CTSG	cathepsin G	3.97	4.17e-06
17096030	FBP1	fructose-1,6-bisphosphatase 1	3.97	4.86e-05
17093031	MOB3B	MOB kinase activator 3B	3.97	6.13e-06
17088100	UGCG	UDP-glucose ceramide glucosyltransferase	3.97	6.2e-06
16858137	ICAM1	intercellular adhesion molecule 1	3.99	5.38e-06
17012182	PKIB	protein kinase (cAMP-dependent, catalytic) inhibitor beta	4	0.0001
16996246	RNF138P1	ring finger protein 138, E3 ubiquitin protein ligase pseudogene 1	4	7.47e-06
16975394	RBM47	RNA binding motif protein 47	4.01	1.18e-05
17101292	STS	steroid sulfatase (microsomal), isozyme S	4.02	2.07e-05
16731754	IL10RA	interleukin 10 receptor, alpha	4.05	4.96e-06
16969229	DAPP1	dual adaptor of phosphotyrosine and 3-phosphoinositides	4.09	5.23e-06
17004167	IRF4	interferon regulatory factor 4	4.11	8.09e-06
16862427	CYP2S1	cytochrome P450, family 2, subfamily S, polypeptide 1	4.12	7.87e-06
16867975	FCER2	Fc fragment of IgE, low affinity II, receptor for (CD23)	4.13	0.0001
16732985	SLC37A2	solute carrier family 37 (glucose-6-phosphate transporter), member 2	4.13	0.0002
16976599	SULT1B1	sulfotransferase family 1B member 1	4.15	0.0004
16761326	KLRC4-KLRK1; KLRK1; KLRC4	KLRC4-KLRK1 readthrough; killer cell lectin-like receptor subfamily K, member 1; killer cell lectin-like receptor subfamily C, member 4	4.17	0.0002
16865383	LILRA1	leukocyte immunoglobulin-like receptor, subfamily A (with TM domain), member 1	4.18	0.001
17056701	AOAH	acyloxyacyl hydrolase (neutrophil)	4.2	1.5e-05
16917939	CST3	cystatin C	4.21	5.29e-06
16896296	NLRC4	NLR family, CARD domain containing 4	4.21	1.28e-05
17000724	HBEGF	heparin-binding EGF-like growth factor	4.26	6.16e-05
16945682	ACPP	acid phosphatase, prostate	4.31	4.27e-06
16774303	RGCC	regulator of cell cycle	4.33	2.2e-05
16851866	DTNA	dystrobrevin, alpha	4.37	2.55e-05
16704375	ALOX5	arachidonate 5-lipoxygenase	4.38	5.12e-06
17000159	TIFAB	TRAF-interacting protein with forkhead-associated domain, family member B	4.39	1.15e-05
17110463	CFP	complement factor properdin	4.43	0.0003
16856292	ELANE	elastase, neutrophil expressed	4.49	3.62e-06
16981119	2019-03-01	membrane associated ring finger 1	4.5	5.26e-05
16809971	MYO1E	myosin IE	4.54	3.48e-05
16916492	SIRPB1	signal-regulatory protein beta 1	4.54	3.58e-06
17008056	FGD2	FYVE, RhoGEF and PH domain containing 2	4.56	2.18e-05
16980096	TBC1D9	TBC1 domain family, member 9 (with GRAM domain)	4.56	7.66e-05
17004518	LY86	lymphocyte antigen 86	4.58	3.07e-06
16719644	BNIP3	BCL2/adenovirus E1B 19kDa interacting protein 3	4.6	6.38e-06
17102792	GPR34	G protein-coupled receptor 34	4.6	3.6e-05
16857736	MCEMP1	mast cell-expressed membrane protein 1	4.6	0.0002
16975213	TLR1	toll-like receptor 1	4.62	2.08e-05
17025018	IPCEF1; CNKSR3	interaction protein for cytohesin exchange factors 1; CNKSR family member 3	4.63	4.57e-06
16672362	MNDA	myeloid cell nuclear differentiation antigen	4.65	4.9e-06
16965268	CD38	CD38 molecule	4.67	4.01e-06
17019056	TREM1	triggering receptor expressed on myeloid cells 1	4.71	3.37e-05
16781591	RNASE6	ribonuclease, RNase A family, k6	4.77	2.18e-06
16819152	CES1P1	carboxylesterase 1 pseudogene 1	4.78	1.53e-05
16780592	GPR183	G protein-coupled receptor 183	4.8	3.91e-06
16812245	CTSH	cathepsin H	5.02	5.1e-05
16864651	SIGLEC7	sialic acid binding Ig-like lectin 7	5.03	5.12e-05
16967771	CXCL8	chemokine (C-X-C motif) ligand 8	5.04	5.02e-06
16744991	MPZL3	myelin protein zero-like 3	5.08	1.81e-05
16912472	HCK	HCK proto-oncogene, Src family tyrosine kinase	5.1	2.18e-06
16767335	CPM	carboxypeptidase M	5.13	1.1e-05
16894710	FAM49A	family with sequence similarity 49, member A	5.16	3.04e-06
16864756	FPR3	formyl peptide receptor 3	5.22	1.09e-05
16984010	IL7R	interleukin 7 receptor	5.23	0.0002
17063722	CLEC5A	C-type lectin domain family 5, member A	5.26	2.92e-06
16713187	NRP1	neuropilin 1	5.27	2.41e-05
16874533	NAPSB	napsin B aspartic peptidase, pseudogene	5.3	0.0002
16679349	KMO	kynurenine 3-monooxygenase (kynurenine 3-hydroxylase)	5.37	0.0001
16744967	AMICA1	adhesion molecule, interacts with CXADR antigen 1	5.41	2.28e-06
17106493	IL13RA1	interleukin 13 receptor, alpha 1	5.43	1.72e-06
16957433	CD200R1	CD200 receptor 1	5.56	1.74e-06
16782001	TRDJ3	T cell receptor delta joining 3	5.56	5.55e-05
17063507	KDM7A	lysine (K)-specific demethylase 7A	5.58	4.2e-06
16672942	HSPA7	heat shock 70kDa protein 7 (HSP70B)	5.62	2.03e-05
17101537	TLR8	toll-like receptor 8	5.64	0.0001
17059567	STEAP4	STEAP family member 4	5.66	2.25e-05
16780585	GPR18	G protein-coupled receptor 18	5.86	3.43e-05
17088527	TLR4	toll-like receptor 4	5.88	5.8e-06
16765226	ITGB7	integrin beta 7	5.9	8.12e-06
16763966	SNORA2A	small nucleolar RNA, H/ACA box 2A	5.92	4.28e-05
16725227	MS4A14	membrane-spanning 4-domains, subfamily A, member 14	5.93	7.03e-06
16782122	TRAV20; TRAJ17; TRDV2; TRAC	T cell receptor alpha variable 20; T cell receptor alpha joining 17; T cell receptor delta variable 2; T-cell receptor alpha constant	6	3.26e-05
16738694	MPEG1	macrophage expressed 1	6.03	1.13e-06
16977970	GPRIN3	GPRIN family member 3	6.08	1.31e-06
16962584	BCL6	B-cell CLL/lymphoma 6	6.1	1.39e-06
17118066	LOC441081	POM121 membrane glycoprotein (rat) pseudogene	6.11	1.52e-06
17118127	LOC102724994; LOC102724995; LOC101929599; LOC105369229; LOC101929812	putative POM121-like protein 1-like	6.11	1.52e-06
17118058	LOC728093; LOC643784	putative POM121-like protein 1-like; NLR family, apoptosis inhibitory protein pseudogene	6.11	1.52e-06
17101531	TLR7	toll-like receptor 7	6.15	6.16e-06
17111711	VSIG4	V-set and immunoglobulin domain containing 4	6.21	2.41e-06
16875448	LILRA5	leukocyte immunoglobulin-like receptor, subfamily A (with TM domain), member 5	6.32	5.72e-06
17087517	NR4A3	nuclear receptor subfamily 4, group A, member 3	6.34	0.0001
16702836	MRC1	mannose receptor, C type 1	6.38	1.06e-06
16779839	KCTD12	potassium channel tetramerization domain containing 12	6.48	1.48e-05
17023810	SGK1	serum/glucocorticoid regulated kinase 1	6.48	9.61e-07
17006659	TNF	tumor necrosis factor	6.51	1.52e-05
16702881	MRC1	mannose receptor, C type 1	6.53	1.44e-06
16782003	TRDC	T cell receptor delta constant	6.62	1.7e-06
16886105	HNMT	histamine N-methyltransferase	6.65	1.29e-06
16707791	ENTPD1	ectonucleoside triphosphate diphosphohydrolase 1	6.71	1.26e-06
16833426	CCL4L2; CCL4L1	chemokine (C-C motif) ligand 4-like 2; chemokine (C-C motif) ligand 4-like 1	6.74	2.76e-06
16960554	GPR171	G protein-coupled receptor 171	6.75	5.07e-06
17094761	KLF9	Kruppel-like factor 9	6.75	2.95e-06
16702872	TMEM236	transmembrane protein 236	6.77	1.8e-05
16672920	FCGR2B	Fc fragment of IgG, low affinity IIb, receptor (CD32)	6.86	5.25e-06
16843602	CCL3L3; CCL3L1	chemokine (C-C motif) ligand 3-like 3; chemokine (C-C motif) ligand 3-like 1	6.91	1.93e-06
16769250	IGF1	insulin-like growth factor 1 (somatomedin C)	6.91	0.0003
17074523	LINC00599	long intergenic non-protein coding RNA 599	6.98	1.22e-06
16672654	SLAMF7	SLAM family member 7	7.05	5.93e-05
16836333	SCPEP1	serine carboxypeptidase 1	7.11	2.25e-06
16725210	MS4A7; MS4A14	membrane-spanning 4-domains, subfamily A, member 7; membrane-spanning 4-domains, subfamily A, member 14	7.17	6.16e-06
16738657	GLYATL2	glycine-N-acyltransferase-like 2	7.2	1.34e-05
16818239	ITGAM	integrin, alpha M (complement component 3 receptor 3 subunit)	7.3	2.88e-06
16761193	CLECL1	C-type lectin-like 1	7.33	6.88e-06
16697095	NCF2	neutrophil cytosolic factor 2	7.44	4.43e-06
16716590	MYOF	myoferlin	7.49	2.53e-06
16730788	RAB39A	RAB39A, member RAS oncogene family	7.49	2.68e-06
16761293	OLR1	oxidized low density lipoprotein (lectin-like) receptor 1	7.52	5.3e-05
16919022	SAMHD1	SAM domain and HD domain 1	7.56	6.91e-07
16774053	CCNA1	cyclin A1	7.57	7.71e-06
16693414	S100A8	S100 calcium binding protein A8	7.66	9.41e-07
16826738	MT1G	metallothionein 1G	7.74	2.16e-05
16896836	SLC8A1	solute carrier family 8 (sodium/calcium exchanger), member 1	8.02	6.67e-06
16840473	CLEC10A	C-type lectin domain family 10, member A	8.08	1.4e-06
16725184	MS4A4A	membrane-spanning 4-domains, subfamily A, member 4A	8.09	2.2e-06
16672333	CD1E	CD1e molecule	8.1	0.0002
16671139	S100A9	S100 calcium binding protein A9	8.17	1.54e-06
16855810	CD226	CD226 molecule	8.3	2e-06
17102801	GPR82	G protein-coupled receptor 82	8.45	3.09e-06
17080516	ENPP2	ectonucleotide pyrophosphatase/phosphodiesterase 2	8.47	1.93e-06
16848070	SLC16A6	solute carrier family 16, member 6	8.77	3.33e-06
16734858	HBBP1	hemoglobin, beta pseudogene 1	8.99	5.58e-07
17058968	FGL2	fibrinogen-like 2	9.34	5.85e-07
17001545	CSF1R	colony stimulating factor 1 receptor	9.45	5.65e-07
16848590	LOC105371892	uncharacterized LOC105371892	9.52	4.52e-05
16996813	CD180	CD180 molecule	9.56	1.81e-06
17000793	CD14	CD14 molecule	9.8	3.43e-06
16695023	CD1B	CD1b molecule	10.21	3.08e-06
16864639	SIGLEC9	sialic acid binding Ig-like lectin 9	10.23	7.52e-07
16781999	TRDJ2	T cell receptor delta joining 2	10.3	4.99e-07
16944618	CD86	CD86 molecule	10.49	2.45e-06
16908305	CXCR2P1	chemokine (C-X-C motif) receptor 2 pseudogene 1	10.51	5.02e-05
16670367	FCGR1A	Fc fragment of IgG, high affinity Ia, receptor (CD64)	10.57	3.1e-06
17099707	FCN1	ficolin (collagen/fibrinogen domain containing) 1	10.67	3.29e-06
16819252	MT1F	metallothionein 1F	10.76	3.49e-06
16940172	CCR2	chemokine (C-C motif) receptor 2	11.49	2.83e-07
16859763	IFI30	interferon, gamma-inducible protein 30	11.72	4.59e-07
16886174	KYNU	kynureninase	12.17	3.42e-07
16738819	MS4A6A	membrane-spanning 4-domains, subfamily A, member 6A	12.36	1.34e-06
16747896	CLEC4A	C-type lectin domain family 4, member A	12.43	1.61e-06
16669196	CD101	CD101 molecule	12.54	3e-05
16738456	PRG3	proteoglycan 3	12.98	1.31e-06
16748590	EMP1	epithelial membrane protein 1	13.5	2.94e-07
16693409	S100A12	S100 calcium binding protein A12	15.48	7.31e-07
16760792	CD163	CD163 molecule	15.75	2.89e-06
17102538	CYBB	cytochrome b-245, beta polypeptide	16	1.62e-07
16749939	LRRK2	leucine-rich repeat kinase 2	16.06	1.7e-07
16711501	IL2RA	interleukin 2 receptor, alpha	16.27	3.46e-07
16874945	FPR1	formyl peptide receptor 1	16.65	1.76e-06
16968680	SPP1	secreted phosphoprotein 1	16.68	1.05e-06
16824907	IGSF6	immunoglobulin superfamily, member 6	17.28	7.6e-06
16952874	CCR1	chemokine (C-C motif) receptor 1	17.31	5.05e-07
16840245	SCIMP	SLP adaptor and CSK interacting membrane protein	18.18	4.32e-06
16761726	PLBD1	phospholipase B domain containing 1	18.27	1.27e-06
16761269	CLEC7A	C-type lectin domain family 7, member A	19.85	1.67e-07
16919962	SULF2	sulfatase 2	21.74	3.53e-06
16672323	CD1C	CD1c molecule	21.8	9.8e-08
16833204	CCL2	chemokine (C-C motif) ligand 2	23.34	1.97e-05
16672315	CD1A	CD1a molecule	27.76	5.22e-07
16986913	VCAN	versican	81.71	3.91e-06
